# Supplementary material for: Everolimus in Patients with Autosomal Dominant Polycystic Kidney Disease
Source: Atypon-hosted journal article supplement (doi:10.1056/nejmoa1003491), 2010-06-26
Supplement: nejmoa1003491_appendix.pdf [file nejmoa1003491_appendix.pdf]

## Supplementary Appendix

This appendix has been provided by the authors to give readers additional information about their work.

Supplement to: Walz G, Budde K, Mannaa M, et al. Everolimus in patients with autosomal dominant polycystic kidney disease. *N Engl J Med* 2010;363:830-40. DOI: 10.1056/NEJMoa1003491.

## Supplementary Appendix

**Table 1. Changes in eGFR from Baseline.** Changes in eGFR were calculated, using the MDRD formular. Nearly identical results were obtained using the CKD-EPI formula.

| Change from baseline in eGFR | Everolimus<br>(N = 213) | Placebo<br>(N = 216) | Difference | P value |
|------------------------------|-------------------------|----------------------|------------|---------|
| Week 1                       | 2.03                    | -0.89                | 2.92       | <0.001  |
| Week 2                       | 1.73                    | -0.87                | 2.60       | <0.001  |
| Week 4                       | 0.57                    | -1.22                | 1.79       | 0.005   |
| Month 3                      | -0.48                   | -1.17                | 0.69       | 0.356   |
| Month 6                      | -2.29                   | -2.19                | -0.10      | 0.890   |
| Month 9                      | -4.58                   | -2.42                | -2.16      | 0.004   |
| Month 12                     | -5.42                   | -3.22                | -2.20      | 0.004   |
| Month 18                     | -7.71                   | -5.54                | -2.17      | 0.008   |
| Month 24                     | -8.91                   | -7.68                | -1.23      | 0.145   |

**Table 2. Antihypertensives after Study**

|                                | Everolimus<br>(N = 213) | Placebo<br>(N = 216) | Difference<br>(p value) |
|--------------------------------|-------------------------|----------------------|-------------------------|
| Total N (%)                    | 198 (93.0%)             | 198 (91.7%)          | 0.7178                  |
| Agents acting on RAS, N (%)    | 191 (89.7%)             | 188 (87.0%)          | 0.4528                  |
| Beta blocking agents, N (%)    | 101 (47.4%)             | 94 (43.5%)           | 0.4388                  |
| Calcium Channel blocker, N (%) | 71 (33.3%)              | 70 (32.4%)           | 0.9182                  |
| Diuretics, N (%)               | 66 (31.0%)              | 54 (25.0%)           | 0.1967                  |

**Table 3A. Lipid profile – Values at Baseline and after 24 Months**

|                            | Everolimus<br>(N = 214) | Placebo<br>(N = 217) | Difference<br>(p values, t-<br>test) |
|----------------------------|-------------------------|----------------------|--------------------------------------|
| Total Cholesterol (mmol/L) |                         |                      |                                      |
| Baseline                   | 5.3 ± 1.0               | 5.1 ± 1.0            | 0.046                                |
| Month 12                   | 6.0 ± 1.2               | 5.1 ± 0.9            | <0.001                               |
| Month 24                   | 5.9 ± 1.0               | 5.1 ± 0.9            | <0.001                               |
| Triglycerides (mmol/L)     |                         |                      |                                      |
| Baseline                   | 1.5 ± 0.9               | 1.5 ± 0.9            | 0.896                                |
| Month 12                   | 2.2 ± 1.2               | 1.6 ± 1.0            | <0.001                               |
| Month 24                   | 2.3 ± 1.5               | 1.7 ± 1.2            | <0.001                               |
| LDL (mmol/L)               |                         |                      |                                      |
| Baseline                   | 1.5 ± 0.4               | 1.5 ± 0.4            | 0.728                                |
| Month 12                   | 1.4 ± 0.4               | 1.4 ± 0.4            | 0.678                                |
| Month 24                   | 1.4 ± 0.4               | 1.4 ± 0.4            | 0.871                                |
| HDL (mmol/L)               |                         |                      |                                      |
| Baseline                   | 3.3 ± 0.9               | 3.0 ± 0.8            | 0.135                                |
| Month 12                   | 3.7 ± 0.9               | 3.1 ± 0.9            | <0.001                               |
| Month 24                   | 3.6 ± 0.8               | 3.1 ± 0.7            | <0.001                               |

**Table 3B. Lipid Lowering Agents**

| Before Study Initiation     | Everolimus<br>(N = 213) | Placebo<br>(N = 216) | Difference<br>(p value) |
|-----------------------------|-------------------------|----------------------|-------------------------|
| Total N (%)                 | 29 (13.6%)              | 29 (13.4%)           | >0.999                  |
| Statins                     | 22 (10.3%)              | 26 (12.0%)           | 0.647                   |
| Other Lipid-Lowering Agents | 7 ( 3.3%)               | 4 ( 1.9%)            | 0.379                   |

  

| After Study Initiation      | Everolimus<br>(N = 213) | Placebo<br>(N = 216) | Difference<br>(p value) |
|-----------------------------|-------------------------|----------------------|-------------------------|
| Total N (%)                 | 85 (39.9%)              | 46 (21.3%)           | <0.001                  |
| Statins                     | 76 (35.7%)              | 42 (19.4%)           | <0.001                  |
| Other Lipid-Lowering Agents | 12 ( 5.6%)              | 8 ( 3.7%)            | 0.369                   |

**Table 4. Major Protocol Violations.** Major protocol violations were determined before unblinding the database and resulted in exclusion of patients from the per-protocol population. Note that several patients had more than one major protocol violation.

|                                                                                         | Everolimus<br>(N= 214) | Placebo<br>(N=217) |
|-----------------------------------------------------------------------------------------|------------------------|--------------------|
| Patients without major protol violations                                                | 91 (42.5%)             | 123 (56.7%)        |
| Patients with major protocol violations                                                 | 123 (57.5%)            | 94 (43.3%)         |
| Missing MRI at month 12 and/or 24                                                       | 96 (44.9%)             | 68 (31.3%)         |
| Deviation from standard MRI procedure                                                   | 27 (17%)               |                    |
| Incomplete kidney coverage                                                              | 18 (11%)               |                    |
| Incomplete separation from liver cysts                                                  | 40 (24%)               |                    |
| Artifacts due to strong patient motion                                                  | 8 (5%)                 |                    |
| Other                                                                                   | 71 (43%)               |                    |
| Missing baseline MRI                                                                    | 45 (21.0%)             | 42 (19.6%)         |
| Deviation from standard MRI procedure                                                   | 27 (31%)               |                    |
| Incomplete kidney coverage                                                              | 30 (35%)               |                    |
| Incomplete separation from liver cysts                                                  | 19 (22%)               |                    |
| Artifact due to strong patient motion                                                   | 5 (6%)                 |                    |
| Other                                                                                   | 6 (7%)                 |                    |
| Missing MRI at month 12 and 24                                                          | 50 (23.4%)             | 35 (17.1%)         |
| Missing MRI only at month 12                                                            | 4 (1.9%)               | 7 (3.2%)           |
| Missing MRI only at month 24                                                            | 42 (24.3%)             | 26 (12.0%)         |
| Valid baseline MRI and missing MRI at month 12 and/or 24                                | 64 (29.9%)             | 42 (19.4%)         |
| Missing MRI at month 12 and 24                                                          | 23 (10.7%)             | 13 (6.0%)          |
| Missing MRI only at month 12                                                            | 4 (1.9%)               | (2.8%)             |
| Missing MRI only at month 24                                                            | 37 (17.3%)             | 23 (10.6%)         |
| Study drug interruption for more than 28 consecutive days or more than 56 days combined | 26 (12.1%)             | 14 (6.5%)          |
| GFR < 30 mL/min/1.73m <sup>2</sup>                                                      | 17 (7.9%)              | 10 (4.6%)          |
| Code broken without emergency reason                                                    | 4 (1.9%)               | -                  |
| No post baseline visit                                                                  | 1 (0.5%)               | 1 (0.5%)           |
| Unresolved history or current drug or alcohol abuse                                     | 1 (0.5%)               | -                  |
| History of malignancy during the last five years                                        | 1 (0.5%)               | 1 (0.5%)           |
| Pregnancy                                                                               | 1 (0.5%)               | -                  |

# Everolimus in ADPKD

**A**

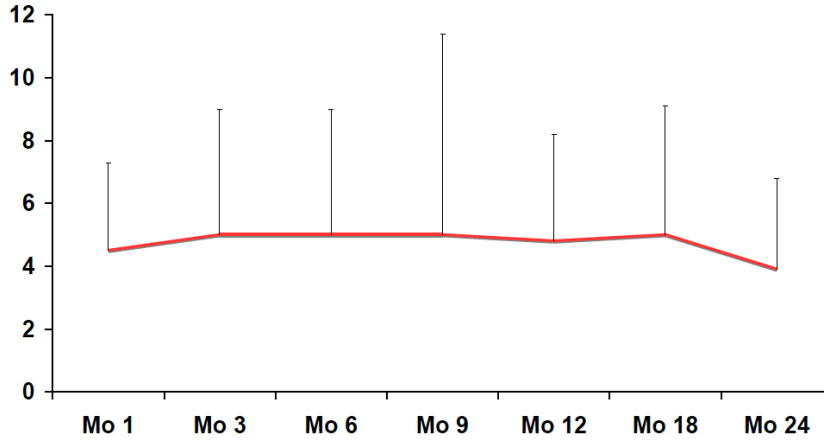

**B**

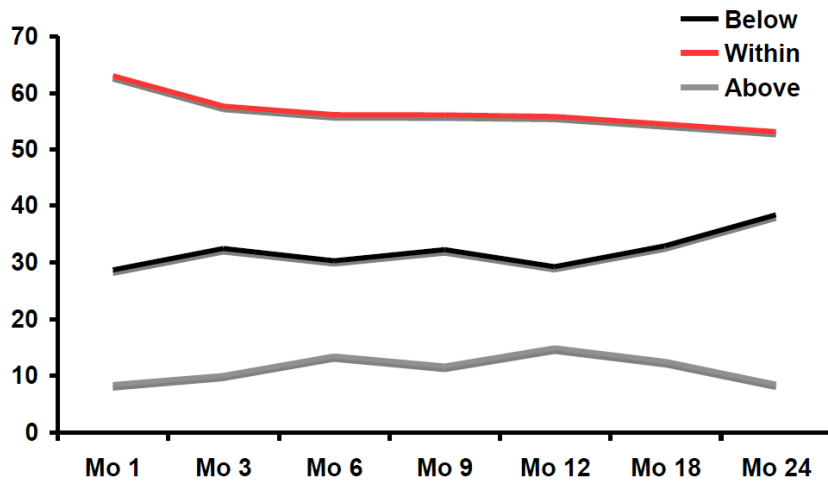

**Figure 1. Everolimus trough levels.**

A. Depicted are the mean everolimus trough levels with standard deviation.

B. Depicted is the percentage of patients within (red), below (black) or above (grey) the desired everolimus concentration between 3 and 8 ng/mL.

## Everolimus in ADPKD

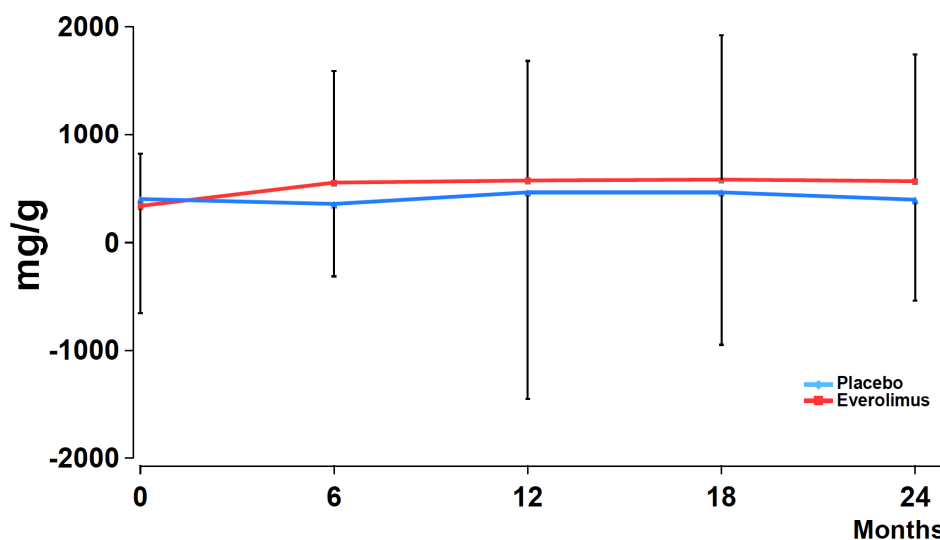

### Figure 2. Proteinuria.

Proteinuria, estimated as urinary protein/creatinine ratio (mg/g), is depicted with standard deviations over the 2-year treatment period. After two years the difference between the everolimus and placebo group was 296 mg/g ( $p=0.008$ ).

### Information. MRI Protocol

All measurements were carried out on 1.5T MR scanners. A phased-array surface coil was positioned with its center over the inferior costal margin. An initial scout scan was performed to localize the kidneys. Breath-hold coronal T2-weighted images (FSE/HASTE) with fat saturation, followed by T1 weighted in- and out-of-phase gradient echo images (Flash/GE) without fat suppression were obtained. All three sequence were acquired with coronal orientation, FOV = 400mm, 256x256 matrix and with slice packages covering the entire volume of interest including kidneys and kidney cysts. TE and TR were 200ms/652ms for the T2-weighted sequence, and (2,38ms/4,76ms)/150ms for the opus and in-phase gradient echo sequences, respectively. Total kidney volumes were measured from T1-weighted images using region of interest drawing. Renal cyst volumes were determined using T2-weighted images and region-based thresholds, utilizing an interactive selection of a threshold by an analyst using T2-weighted images. Cysts were brighter than the renal parenchyma in T2-weighted images and were segmented from voxels with intensity values higher than the threshold. Total kidney and cyst volumes were calculated from sets of contiguous images by summing the products of the area measurements and the slice thickness. The percentage of the cyst volume was determined from the ratio of cyst volume to total kidney volume.
